# Supplementary material for: Effect of copper loading on synergism in CuO/CeO2 nanorod catalysts for toluene combustion
Source: Royal Society of Chemistry journal article supplement (doi:10.1039/d3nj04820a), 2024-01-01
Supplement: d3nj04820a1.pdf [file d3nj04820a1.pdf]

**Effect of copper loading on synergism in CuO/CeO<sub>2</sub> nanorod catalyst  
for toluene combustion**

Xin Gao<sup>a</sup>, Jianyu Yun<sup>a</sup>, Linlin Deng<sup>a</sup>, Xiaokun Yi<sup>a</sup>, Zihao Teng<sup>a</sup>, Yifan Wang<sup>a</sup>,

Baojuan Dou<sup>a,\*</sup>, Feng Bin<sup>b,\*\*</sup>

<sup>a</sup> Tianjin University of Science & Technology, Tianjin 300457, PR China;

<sup>b</sup> State Key Laboratory of High-Temperature Gas Dynamics, Institute of Mechanics,  
Chinese Academy of Sciences, Beijing 100190, PR China;

Table S1 ICP-MS results for the catalysts

| Catalyst | Copper oxide concentration (ppb) | Copper oxide loading ratio (wt. %) |
|----------|----------------------------------|------------------------------------|
| CuCe-1   | 430.1                            | 0.83                               |
| CuCe-2   | 511.3                            | 1.33                               |
| CuCe-3   | 665.2                            | 2.74                               |
| CuCe-4   | 790.7                            | 3.82                               |
| CuCe-5   | 880.3                            | 4.29                               |

Table S2 Consumption of temperature programmed experiments

| Catalyst | H <sub>2</sub> consumption (μmol/g) |              |               | O <sub>2</sub> desorption (μmol/g) |              |
|----------|-------------------------------------|--------------|---------------|------------------------------------|--------------|
|          | Peak $\alpha$                       | Peak $\beta$ | Peak $\gamma$ | Peak $\alpha$                      | Peak $\beta$ |
| CuCe-1   | 1.04                                | 17.36        | 8.77          | 1.78                               | 0.92         |
| CuCe-2   | 5.50                                | 28.09        | 4.85          | 1.95                               | 0.78         |
| CuCe-3   | 3.47                                | 8.97         | 3.32          | 5.98                               | 2.59         |
| CuCe-4   | 1.07                                | 10.76        | 3.93          | 0.90                               | 10.85        |
| CuCe-5   | 5.70                                | 7.27         | 8.13          | 1.48                               | 3.02         |

Table S3 Comparison of catalytic activities in different reference

| Catalyst                                | Toluene reaction gas mixture | GHSV ( $\text{mL}\cdot\text{g}_{\text{cat}}^{-1}\cdot\text{h}^{-1}$ ) | T <sub>100</sub> (°C) | Reference |
|-----------------------------------------|------------------------------|-----------------------------------------------------------------------|-----------------------|-----------|
| CuCe-4                                  | 1000ppm                      | 18000                                                                 | 260                   | This work |
| CuO                                     | 1000ppm                      | 30000                                                                 | 280                   | [1]       |
| Cu <sub>0.5</sub> Ce <sub>0.5</sub> -C  | 500ppm                       | 50000                                                                 | 298                   | [2]       |
| Cu <sub>0.5</sub> Ce <sub>0.5</sub> -DR | 500ppm                       | 50000                                                                 | 260                   | [2]       |
| CuCe-SG                                 | 1500ppm                      | 35000                                                                 | 280                   | [3]       |

[1] B. Song, C. Li, X. Du, S. Li, Y. Zhang, Y. Lyu, Q. Zhou, Superior performance of Cu-Ce binary oxides for toluene catalytic oxidation: Cu-Ce synergistic effect and reaction pathways, *Fuel*. 306 (2021) 121654. <https://doi.org/10.1016/J.FUEL.2021.121654>.

[2] Y. Zeng, K.G. Haw, Z. Wang, Y. Wang, S. Zhang, P. Hongmanorom, Q. Zhong, S. Kawi, Double redox process to synthesize CuO–CeO<sub>2</sub> catalysts with strong Cu–Ce interaction for efficient toluene oxidation, *J Hazard Mater*. 404 (2021) 124088. <https://doi.org/10.1016/J.JHAZMAT.2020.124088>.

[3] H. Shang, X. Zhang, J. Xu, Y. Han, Effects of preparation methods on the activity of CuO/CeO<sub>2</sub> catalysts for CO oxidation, *Front Chem Sci Eng*. 11 (2017) 603–612. <https://doi.org/10.1007/S11705-017-1661-Z/METRICS>.
